# Supplementary material
Source: bioRxiv or medRxiv preprint supplement (https://www.biorxiv.org/highwire/filestream/140878/field_highwire_adjunct_files/2/470393-3.pdf)
Supplement: Supplementary file [file 470393-3.pdf]

**Table 3 – Stat table**

Table 3 - Stat table reporting all exact number of replicates, tests used and statistics. All data were analyzed with Prism (GraphPad 6 or 7) and all experiments were performed in at least three independent biological replicates. For all tests, the significance level was  $\alpha = 0.05$ , \* $p \leq 0.05$ , \*\* $p \leq 0.01$ , \*\*\* $p \leq 0.001$ , \*\*\*\* $p \leq 0.0001$ , ns: not significant.

| Graph description                                                    | Figure no. | Normality test | TEST USED                                                                     | n           |                                                                                                                                                   |                                                                                                                                      | AVERAGE, VARIANCE               | P VALUE                                                 |             | DEGREES OF FREEDOM VALUE |
|----------------------------------------------------------------------|------------|----------------|-------------------------------------------------------------------------------|-------------|---------------------------------------------------------------------------------------------------------------------------------------------------|--------------------------------------------------------------------------------------------------------------------------------------|---------------------------------|---------------------------------------------------------|-------------|--------------------------|
|                                                                      |            |                |                                                                               | exact value | DEFINED                                                                                                                                           | extra infos                                                                                                                          |                                 | REPORTED                                                | exact value |                          |
| Precursors 181a-1 and 181a-2 expression level - EYE                  | S1E        | N too small    | Mann-Whitney 2-tailed                                                         | 4           | 4 biological replicates                                                                                                                           | from 4 frogs (= indep. exp.)                                                                                                         | mean +/- SEM                    | *                                                       | 0.0286      |                          |
| Precursors 181a-1 and 181a-2 expression level - ISOLATED AX          | S1F        | N too small    | Mann-Whitney 2-tailed                                                         | 4           | 4 biological replicates                                                                                                                           | from 4 frogs (= indep. exp.)                                                                                                         | mean +/- SEM                    | *                                                       | 0.0286      |                          |
| RT-qPCR Drosha-MO vs co-MO vs WT                                     | 2E         | yes            | 1-way Anova for multiple comparison (Tukey)                                   | 3           | WT - 3 biological replicates                                                                                                                      | from 3 frogs (= indep. exp.)                                                                                                         | mean +/- SEM                    | ** (WT vs MO)                                           | 0.0041      | 6                        |
|                                                                      |            | yes            |                                                                               |             | co-MO - 3 biological replicates                                                                                                                   | from 3 frogs (= indep. exp.)                                                                                                         | mean +/- SEM                    | * (co-MO vs MO)                                         | 0.0351      | 6                        |
|                                                                      |            | yes            |                                                                               |             | MO - 3 biological replicates                                                                                                                      | from 3 frogs (= indep. exp.)                                                                                                         | mean +/- SEM                    | ns (WT vs co-MO)                                        | 0.1871      | 6                        |
| Number of puncta/ $\mu\text{m}$ with MO KD_WT - co-MO - MO           | 2F         | no             | Kruskall wallis (non parametric 1-way Anova) for multiple comparisons (Dunn)  | 61          | (WT+ MB). 61 axons in which the total the number of particles was normalized on the axonal length measured in $\mu\text{m}$                       | from 4 frogs (= indep. exp.)                                                                                                         | mean +/- SEM                    | **** (WT vs MO)                                         | <0.0001     |                          |
|                                                                      |            | yes            |                                                                               | 15          | (250 $\mu\text{M}$ co-MO + MB). 15 axons in which the total the number of particles was normalized on the axonal length measured in $\mu\text{m}$ | from 4 frogs (= indep. exp.)                                                                                                         | mean +/- SEM                    | *** (co-MO vs MO)                                       | 0.0002      |                          |
|                                                                      |            | yes            |                                                                               | 35          | (250 $\mu\text{M}$ MO + MB). 35 axons in which the total the number of particles was normalized on the axonal length measured in $\mu\text{m}$    | from 4 frogs (= indep. exp.)                                                                                                         | mean +/- SEM                    | ns (WT vs co-MO)                                        | 0.8114      |                          |
| Coloc exo-endo (#MB+pre-miR+)                                        | 2K         | yes            |                                                                               | 32          | 32 single axons. (Compute relative % in each axon of coloc)                                                                                       | from 5 frogs (= indep. exp.)                                                                                                         | mean +/- SEM                    |                                                         |             |                          |
| Percentage of puncta moving antero and retro (ENDO and EXO)          | 3D         |                | 2-way ANOVA multiple comparisons (Sidak)                                      | 3           | 3 biological replicates (endo)                                                                                                                    | from 3 frogs (= indep. exp.) Compute relative % in each N and then compare endo exo, antero retro                                    | mean +/- SEM                    | ns (endo antero vs exo antero)                          | 0.8358      | 10                       |
|                                                                      |            |                |                                                                               | 4           | 4 biological replicates (exo)                                                                                                                     | from 4 frogs (= indep. exp.) Compute relative % in each N and then compare endo exo, antero retro                                    | mean +/- SEM                    | ns (endo retro vs exo retro)                            | 0.8358      | 10                       |
|                                                                      |            |                |                                                                               |             |                                                                                                                                                   |                                                                                                                                      | mean +/- SEM                    | ns (endo antero vs retro)                               | 0.767       | 10                       |
|                                                                      |            |                |                                                                               |             |                                                                                                                                                   |                                                                                                                                      | mean +/- SEM                    | ns (exo antero vs retro)                                | 0.9033      | 10                       |
| Puncta average speed antero and retro (ENDO and EXO)                 | 3E         | no             | 2-way ANOVA multiple comparison (Tukey)                                       | 72          | MB antero particles <0.2 $\mu\text{m/s}$                                                                                                          | from 3 frogs (= indep. exp.)                                                                                                         | median with interquartile range | ns (antero endo vs exo <0.2 $\mu\text{m/s}$ )           | > 0.9999    | 825                      |
|                                                                      |            | yes            | 2-way ANOVA multiple comparison (Tukey)                                       | 19          | MB antero particles 0.2-0.5 $\mu\text{m/s}$                                                                                                       | from 3 frogs (= indep. exp.)                                                                                                         | median with interquartile range | ns (antero endo vs exo 0.2-0.5 $\mu\text{m/s}$ )        | 0.9882      | 825                      |
|                                                                      |            | no             | 2-way ANOVA multiple comparison (Tukey)                                       | 86          | MB antero particles > 0.5 $\mu\text{m/s}$                                                                                                         | from 3 frogs (= indep. exp.)                                                                                                         | median with interquartile range | ns (antero endo vs exo >0.5 $\mu\text{m/s}$ )           | 0.8911      | 825                      |
|                                                                      |            | no             | 2-way ANOVA multiple comparison (Tukey)                                       | 67          | MB retro particles <0.2 $\mu\text{m/s}$                                                                                                           | from 3 frogs (= indep. exp.)                                                                                                         | median with interquartile range | ns (retro endo vs exo <0.2 $\mu\text{m/s}$ )            | 0.9998      | 825                      |
|                                                                      |            | no             | 2-way ANOVA multiple comparison (Tukey)                                       | 30          | MB retro particles 0.2-0.5 $\mu\text{m/s}$                                                                                                        | from 3 frogs (= indep. exp.)                                                                                                         | median with interquartile range | ns (retro endo vs exo 0.2-0.5 $\mu\text{m/s}$ )         | 0.9998      | 825                      |
|                                                                      |            | no             | 2-way ANOVA multiple comparison (Tukey)                                       | 79          | MB retro particles >0.5 $\mu\text{m/s}$                                                                                                           | from 3 frogs (= indep. exp.)                                                                                                         | median with interquartile range | ns (retro endo vs exo >0.5 $\mu\text{m/s}$ )            | 0.96        | 825                      |
|                                                                      |            | no             | 2-way ANOVA multiple comparison (Tukey)                                       | 50          | Cy3 antero particles <0.2 $\mu\text{m/s}$                                                                                                         | from 4 frogs (= indep. exp.)                                                                                                         | median with interquartile range | ns (antero vs retro endo <0.2 $\mu\text{m/s}$ )         | 0.9996      | 825                      |
|                                                                      |            | no             | 2-way ANOVA multiple comparison (Tukey)                                       | 28          | Cy3 antero particles 0.2-0.5 $\mu\text{m/s}$                                                                                                      | from 4 frogs (= indep. exp.)                                                                                                         | median with interquartile range | ns (antero vs retro endo 0.2-0.5 $\mu\text{m/s}$ )      | 0.9998      | 825                      |
|                                                                      |            | no             | 2-way ANOVA multiple comparison (Tukey)                                       | 157         | Cy3 antero particles > 0.5 $\mu\text{m/s}$                                                                                                        | from 4 frogs (= indep. exp.)                                                                                                         | median with interquartile range | **** (antero vs retro endo >0.5 $\mu\text{m/s}$ )       | < 0.0001    | 825                      |
|                                                                      |            | no             | 2-way ANOVA multiple comparison (Tukey)                                       | 83          | Cy3 retro particles <0.2 $\mu\text{m/s}$                                                                                                          | from 4 frogs (= indep. exp.)                                                                                                         | median with interquartile range | ns (antero vs retro exo <0.2 $\mu\text{m/s}$ )          | 0.9912      | 825                      |
|                                                                      |            | no             | 2-way ANOVA multiple comparison (Tukey)                                       | 62          | Cy3 retro particles 0.2-0.5 $\mu\text{m/s}$                                                                                                       | from 4 frogs (= indep. exp.)                                                                                                         | median with interquartile range | ns (antero vs retro exo 0.2-0.5 $\mu\text{m/s}$ )       | 0.9718      | 825                      |
|                                                                      |            | no             | 2-way ANOVA multiple comparison (Tukey)                                       | 106         | Cy3 retro particles > 0.5 $\mu\text{m/s}$                                                                                                         | from 4 frogs (= indep. exp.)                                                                                                         | median with interquartile range | **** (antero vs retro exo >0.5 $\mu\text{m/s}$ )        | < 0.0001    | 825                      |
| MSD fitting curve (ENDO and EXO)                                     | 3F         | yes            | Non linear regression - comparisons of fit (anomalous diffusion equation), B1 | 67          | endogenous_tracked particles                                                                                                                      | from 3 frogs (= indep. exp.)                                                                                                         | mean +/- SEM                    | ns (H0: B1 same for all data sets, endo vs exo)         | 0.9795      |                          |
|                                                                      |            | yes            |                                                                               | 82          | exogenous_tracked particles                                                                                                                       | from 4 frogs (= indep. exp.)                                                                                                         | mean +/- SEM                    |                                                         |             |                          |
| MSD alpha coefficient distribution (ENDO and EXO)                    | 3G         | no             | Mann-Whitney 2-tailed                                                         | 67          | endogenous_tracked particles                                                                                                                      | from 3 frogs (= indep. exp.)                                                                                                         | median with interquartile range | ns (endo vs exo MSD alpha values)                       | 0.8797      |                          |
|                                                                      |            | no             |                                                                               | 82          | exogenous_tracked particles                                                                                                                       | from 4 frogs (= indep. exp.)                                                                                                         | median with interquartile range |                                                         |             |                          |
| Distribution MSD alpha coefficient per categories (ENDO and EXO)     | 3H         |                | 2-way ANOVA multiple comparison (Tukey)                                       | 3           | endogenous_tracked particles                                                                                                                      | from 3 frogs (= indep. exp.) Compute relative % in each N and then compare endo exo, antero retro                                    | mean +/- SEM                    | ns (endo vs exo MSD_alpha<0.5)                          | 0.7915      | 15                       |
|                                                                      |            |                |                                                                               | 4           | exogenous_tracked particles                                                                                                                       | from 4 frogs (= indep. exp.) Compute relative % in each N and then compare endo exo, antero retro                                    | mean +/- SEM                    | ns (endo vs exo 0.9-MSD_alpha<1.1)                      | 0.9981      | 15                       |
|                                                                      |            |                |                                                                               |             |                                                                                                                                                   |                                                                                                                                      | mean +/- SEM                    | ns (endo vs exo MSD_alpha>1.5)                          | 0.846       | 15                       |
| Percentage per velocity categories _antero (ENDO and EXO)            | S3C        |                | 2-way ANOVA multiple comparison (Tukey)                                       | 3           | 3 biological replicates (endo)                                                                                                                    | from 3 frogs (= indep. exp.) Compute relative % in each N and then compare antero endo vs antero exo                                 | mean +/- SEM                    | ns (endo antero vs exo antero <0.2 $\mu\text{m/s}$ )    | 0.2363      | 30                       |
|                                                                      |            |                |                                                                               | 4           | 4 biological replicates (exo)                                                                                                                     | from 4 frogs (= indep. exp.) Compute relative % in each N and then compare antero endo vs antero exo                                 | mean +/- SEM                    | ns (endo antero vs exo antero 0.2-0.5 $\mu\text{m/s}$ ) | 0.9923      | 30                       |
|                                                                      |            |                |                                                                               |             |                                                                                                                                                   |                                                                                                                                      | mean +/- SEM                    | ns (endo antero vs exo antero >0.5 $\mu\text{m/s}$ )    | 0.1433      | 30                       |
| Percentage per velocity categories _retro (ENDO and EXO)             | S3D        |                | 2-way ANOVA multiple comparison (Tukey)                                       | 3           | 3 biological replicates (endo)                                                                                                                    | from 3 frogs (= indep. exp.) Compute relative % in each N and then compare retro endo vs antero exo                                  | mean +/- SEM                    | ns (endo retro vs exo retro <0.2 $\mu\text{m/s}$ )      | 0.9479      | 30                       |
|                                                                      |            |                |                                                                               | 4           | 4 biological replicates (exo)                                                                                                                     | from 4 frogs (= indep. exp.) Compute relative % in each N and then compare retro endo vs antero exo                                  | mean +/- SEM                    | ns (endo retro vs exo retro 0.2-0.5 $\mu\text{m/s}$ )   | 0.2699      | 30                       |
|                                                                      |            |                |                                                                               |             |                                                                                                                                                   |                                                                                                                                      | mean +/- SEM                    | ns (endo retro vs exo retro >0.5 $\mu\text{m/s}$ )      | 0.5842      | 30                       |
| Percentage categories velocities +/- Nocodazole                      | 4C         |                | 2-way ANOVA multiple comparison (Tukey)                                       | 162         | no Noco MB particles <0.2 $\mu\text{m/s}$                                                                                                         | from 3 frogs (= indep. exp.)                                                                                                         | mean +/- SEM                    | **** (no Noco vs Noco <0.2 $\mu\text{m/s}$ )            | < 0.0001    |                          |
|                                                                      |            |                |                                                                               | 62          | no Noco MB particles 0.2-0.5 $\mu\text{m/s}$                                                                                                      | from 3 frogs (= indep. exp.)                                                                                                         | mean +/- SEM                    | ns (no Noco vs Noco 0.2-0.5 $\mu\text{m/s}$ )           | 0.167       |                          |
|                                                                      |            |                |                                                                               | 134         | no Noco MB particles > 0.5 $\mu\text{m/s}$                                                                                                        | from 3 frogs (= indep. exp.)                                                                                                         | mean +/- SEM                    | ** (no Noco vs Noco >0.5 $\mu\text{m/s}$ )              | 0.0011      |                          |
|                                                                      |            |                |                                                                               | 428         | Noco MB particles <0.2 $\mu\text{m/s}$                                                                                                            | from 4 frogs (= indep. exp.)                                                                                                         |                                 |                                                         |             |                          |
|                                                                      |            |                |                                                                               | 29          | Noco MB particles 0.2-0.5 $\mu\text{m/s}$                                                                                                         | from 3 frogs (= indep. exp.)                                                                                                         |                                 |                                                         |             |                          |
|                                                                      |            |                |                                                                               | 46          | Noco MB particles > 0.5 $\mu\text{m/s}$                                                                                                           | from 3 frogs (= indep. exp.)                                                                                                         |                                 |                                                         |             |                          |
| Mean velocities +/- Nocodazole                                       | 4D         | no             | Mann-Whitney 2-tailed                                                         | 358         | no Noco particles trafficked                                                                                                                      | from 3 frogs (= indep. exp.)                                                                                                         | median with interquartile range | **** (no Noco vs Noco)                                  | < 0.0001    |                          |
|                                                                      |            | no             |                                                                               | 503         | Noco particles trafficked                                                                                                                         | from 3 frogs (= indep. exp.)                                                                                                         | median with interquartile range |                                                         |             |                          |
| Percentage of co-trafficking: % MB+/CD63+ s126+40h                   | 4I         | yes            |                                                                               | 22          | #MB/CD63+ 22 single axons                                                                                                                         | from 5 frogs (=indep.exp.)                                                                                                           | mean +/- SEM                    |                                                         |             |                          |
| Percentage of co-trafficking: % MB+/CD63+ s126+40h (ANTERO vs RETRO) | 4J         | yes            | Unpaired t test 2-tailed                                                      | 22          | 22 single axons                                                                                                                                   | from 5 frogs (=indep.exp.) 92 anterograde particles and 78 retrograde particles on a total of 170 co-trafficked MB+/CD63+ particles. | mean +/- SEM                    | ns (% MB+/CD63+ antero vs retro)                        | 0.7404      |                          |
|                                                                      |            | yes            |                                                                               | 22          | 22 single axons                                                                                                                                   |                                                                                                                                      | mean +/- SEM                    |                                                         |             |                          |

|                                                                     |     |             |                                         |      |                                                  |                                                                                                                                       |              |                                     |                                               |        |
|---------------------------------------------------------------------|-----|-------------|-----------------------------------------|------|--------------------------------------------------|---------------------------------------------------------------------------------------------------------------------------------------|--------------|-------------------------------------|-----------------------------------------------|--------|
| Percentage of co-trafficking: % MB+/CD63+ s137/38                   | S4E | yes         |                                         | 17   | 17 single axons (#MB/CD63+)                      | from 5 frogs (=indep. exp.)                                                                                                           | mean +/- SEM |                                     |                                               |        |
| Percentage of co-trafficking: % MB+/CD63+ s137/38 (ANTERO vs RETRO) | S4F | yes         | Unpaired t test 2-tailed                | 17   | 17 single axons                                  | from 5 frogs (=indep. exp.) 57 anterograde particles and 50 retrograde particles on a total of 116 co-trafficked MB+/CD63+ particles. | mean +/- SEM | ns (% MB+/CD63+ antero vs retro)    | 0.9162                                        |        |
|                                                                     |     | yes         |                                         | 17   | 17 single axons                                  |                                                                                                                                       | mean +/- SEM |                                     |                                               |        |
| Sema3A vs PBS (2 <sup>o</sup> -dCI) norm to PBS)                    | S5D |             |                                         |      |                                                  |                                                                                                                                       |              |                                     |                                               |        |
| miR-181a-5p                                                         |     | N too small | Mann-Whitney 2-tailed                   | 6    | 4 biological replicates + 2 technical replicates | from 4 frogs (= indep. exp.). 40 explants per N.                                                                                      | mean +/- SEM | **                                  | 0.0022                                        |        |
| miR-181a-1-3p                                                       |     | N too small | Mann-Whitney 2-tailed                   | 4    | 3 biological replicates + 1 technical replicate  | from 3 frogs (= indep. exp.). 40 explants per N.                                                                                      | mean +/- SEM | *                                   | 0.0286                                        |        |
| miR-181a-2-3p                                                       |     | N too small | Mann-Whitney 2-tailed                   | 4    | 3 biological replicates + 1 technical replicate  | from 3 frogs (= indep. exp.). 40 explants per N.                                                                                      | mean +/- SEM | *                                   | 0.0286                                        |        |
| pre-miR-181a-1                                                      |     | N too small | Mann-Whitney 2-tailed                   | 4    | 4 biological replicates                          | from 4 frogs (= indep. exp.). 40 explants per N.                                                                                      | mean +/- SEM | *                                   | 0.0286                                        |        |
| pre-miR-181a-2                                                      |     | N too small | Mann-Whitney 2-tailed                   | 5    | 4 biological replicates + 1 technical replicate  | from 4 frogs (= indep. exp.). 40 explants per N.                                                                                      | mean +/- SEM | *                                   | 0.0317                                        |        |
| pre-miR-182                                                         |     | N too small | Mann-Whitney 2-tailed                   | 3    | 3 biological replicates                          | from 3 frogs (= indep. exp.). 40 explants per N.                                                                                      | mean +/- SEM | ns                                  | 0.9                                           |        |
| Sil12 vs PBS (2 <sup>o</sup> -dCI) norm to PBS)                     | S5E |             |                                         |      |                                                  |                                                                                                                                       |              |                                     |                                               |        |
| miR-181a-5p                                                         |     | N too small | Mann-Whitney 2-tailed                   | 4    | 3 biological replicates + 1 technical replicate  | from 3 frogs (= indep. exp.). 40 explants per N.                                                                                      | mean +/- SEM | ns                                  | 0.8571                                        |        |
| miR-181a-1-3p                                                       |     | N too small | Mann-Whitney 2-tailed                   | 4    | 3 biological replicates + 1 technical replicate  | from 3 frogs (= indep. exp.). 40 explants per N.                                                                                      | mean +/- SEM | ns                                  | 0.8286                                        |        |
| miR-181a-2-3p                                                       |     | N too small | Mann-Whitney 2-tailed                   | 4    | 3 biological replicates + 1 technical replicate  | from 3 frogs (= indep. exp.). 40 explants per N.                                                                                      | mean +/- SEM | ns                                  | 0.4286                                        |        |
| pre-miR-181a-1                                                      |     | N too small | Mann-Whitney 2-tailed                   | 4    | 3 biological replicates + 1 technical replicate  | from 3 frogs (= indep. exp.). 40 explants per N.                                                                                      | mean +/- SEM | ns                                  | 0.8286                                        |        |
| pre-miR-181a-2                                                      |     | N too small | Mann-Whitney 2-tailed                   | 4    | 3 biological replicates + 1 technical replicate  | from 3 frogs (= indep. exp.). 40 explants per N.                                                                                      | mean +/- SEM | ns                                  | 0.8286                                        |        |
| pre-miR-182                                                         |     | N too small | Mann-Whitney 2-tailed                   | 4    | 3 biological replicates + 1 technical replicate  | from 3 frogs (= indep. exp.). 40 explants per N.                                                                                      | mean +/- SEM | ns                                  | 0.8286                                        |        |
| Collapse assay – Sema3A with or without CHX                         | S5C |             |                                         |      |                                                  |                                                                                                                                       |              |                                     |                                               |        |
| PBS no CHX                                                          |     |             | 2-way ANOVA multiple comparison (Tukey) | 1380 | counted axons                                    | from 3 frogs (= indep. exp.) each time 1 or 2 plates                                                                                  | mean +/- SEM | **** (PBS vs Sema no CHX)           | <0.0001                                       | 16     |
| Sema3A no CHX                                                       |     |             | 2-way ANOVA multiple comparison (Tukey) | 1125 | counted axons                                    | from 3 frogs (= indep. exp.) each time 1 or 2 plates                                                                                  | mean +/- SEM | **** (Sema no CHX vs CHX)           | <0.0001                                       | 16     |
| PBS CHX                                                             |     |             | 2-way ANOVA multiple comparison (Tukey) | 729  | counted axons                                    | from 3 frogs (= indep. exp.) each time 1 or 2 plates                                                                                  | mean +/- SEM | *** (PBS vs Sema CHX)               | 0.0002                                        | 16     |
| Sema3A CHX                                                          |     |             | 2-way ANOVA multiple comparison (Tukey) | 852  | counted axons                                    | from 3 frogs (= indep. exp.) each time 1 or 2 plates                                                                                  | mean +/- SEM | ns (PBS CHX vs PBS no CHX)          | > 0.9999                                      | 16     |
| miR-181 mature isoforms in isolated axons (upon Sema3A exposure)    | S5D |             |                                         |      |                                                  |                                                                                                                                       |              |                                     |                                               |        |
| miR-181a-5p                                                         |     | yes         | 1-way ANOVA multiple comparison (Tukey) | 6    | 4 biological replicates + 2 technical replicates | from 4 frogs (= indep. exp.). 40 explants per N.                                                                                      | mean +/- SEM | **** (miR-181a-5p vs miR-181a-1-3p) | <0.0001                                       | 11     |
| miR-181a-1-3p                                                       |     | yes         | 1-way ANOVA multiple comparison (Tukey) | 4    | 3 biological replicates + 1 technical replicate  | from 3 frogs (= indep. exp.). 40 explants per N.                                                                                      | mean +/- SEM | **** (miR-181a-5p vs miR-181a-2-3p) | <0.0001                                       | 11     |
| miR-181a-2-3p                                                       |     | yes         | 1-way ANOVA multiple comparison (Tukey) | 4    | 3 biological replicates + 1 technical replicate  | from 3 frogs (= indep. exp.). 40 explants per N.                                                                                      | mean +/- SEM | ns (miR-181a-1-3p vs miR-181a-2-3p) | 0.9318                                        | 11     |
| Collapse assay axonal transfection MOs 5p                           | S6D |             |                                         |      |                                                  |                                                                                                                                       |              |                                     |                                               |        |
| PBS co-MO                                                           |     |             | 2-way ANOVA multiple comparison (Tukey) | 743  | number of counted axons                          | from 3 frogs (= indep. exp.)                                                                                                          | mean +/- SEM | ns (PBS co-MO vs. PBS MO)           | 0.2361                                        | 8      |
| Sema3A co-MO                                                        |     |             | 2-way ANOVA multiple comparison (Tukey) | 907  | number of counted axons                          | from 3 frogs (= indep. exp.)                                                                                                          | mean +/- SEM | *** (PBS co-MO vs. Sema3A co-MO)    | 0.0001                                        | 8      |
| PBS MO                                                              |     |             | 2-way ANOVA multiple comparison (Tukey) | 848  | number of counted axons                          | from 3 frogs (= indep. exp.)                                                                                                          | mean +/- SEM | ns (PBS MO vs. Sema3A MO)           | 0.8605                                        | 8      |
| Sema3A MO                                                           |     |             | 2-way ANOVA multiple comparison (Tukey) | 518  | number of counted axons                          | from 3 frogs (= indep. exp.)                                                                                                          | mean +/- SEM | ** (Sema3A co-MO vs. Sema3A MO)     | 0.0022                                        | 8      |
| Collapse assay axonal transfection MOs 3p                           | S6E |             |                                         |      |                                                  |                                                                                                                                       |              |                                     |                                               |        |
| PBS co-MO                                                           |     |             | 2-way ANOVA multiple comparison (Tukey) | 354  | number of counted axons                          | from 3 frogs (= indep. exp.)                                                                                                          | mean +/- SEM | ns (PBS co-MO vs. PBS MO)           | 0.5602                                        | 8      |
| Sema3A co-MO                                                        |     |             | 2-way ANOVA multiple comparison (Tukey) | 405  | number of counted axons                          | from 3 frogs (= indep. exp.)                                                                                                          | mean +/- SEM | **** (PBS co-MO vs. Sema3A co-MO)   | <0.0001                                       | 8      |
| PBS MO                                                              |     |             | 2-way ANOVA multiple comparison (Tukey) | 317  | number of counted axons                          | from 3 frogs (= indep. exp.)                                                                                                          | mean +/- SEM | ** (PBS MO vs. Sema3A MO)           | 0.0096                                        | 8      |
| Sema3A MO                                                           |     |             | 2-way ANOVA multiple comparison (Tukey) | 324  | number of counted axons                          | from 3 frogs (= indep. exp.)                                                                                                          | mean +/- SEM | ** (Sema3A co-MO vs. Sema3A MO)     | 0.0038                                        | 8      |
| miRNA expression level after MOs 5p microinjection                  | S6B |             |                                         |      |                                                  |                                                                                                                                       |              |                                     |                                               |        |
| miR181 co-MO                                                        |     | N too small | Mann-Whitney 2-tailed                   | 4    | 4 biological replicates                          | from 4 frogs (= indep. exp.)                                                                                                          | mean +/- SEM | *                                   | (miR-181a-5p MO vs co-MO)                     | 0.0286 |
| miR181 MO                                                           |     | N too small | Mann-Whitney 2-tailed                   | 4    | 4 biological replicates                          | from 4 frogs (= indep. exp.)                                                                                                          | mean +/- SEM | *                                   | (miR-181a-1-3p MO vs co-MO)                   | 0.0286 |
| miR181a-1-3p co-MO                                                  |     | N too small | Mann-Whitney 2-tailed                   | 4    | 4 biological replicates                          | from 4 frogs (= indep. exp.)                                                                                                          | mean +/- SEM | *                                   | (miR-181a-1-3p MO vs co-MO)                   | 0.0286 |
| miR181a-1-3p MO                                                     |     | N too small | Mann-Whitney 2-tailed                   | 4    | 4 biological replicates                          | from 4 frogs (= indep. exp.)                                                                                                          | mean +/- SEM | *                                   | (miR-181a-1-3p MO vs co-MO)                   | 0.0286 |
| miR181a-2-3p co-MO                                                  |     | N too small | Mann-Whitney 2-tailed                   | 4    | 4 biological replicates                          | from 4 frogs (= indep. exp.)                                                                                                          | mean +/- SEM | *                                   | (miR-181a-2-3p MO vs co-MO)                   | 0.0286 |
| miR181a-2-3p MO                                                     |     | N too small | Mann-Whitney 2-tailed                   | 4    | 4 biological replicates                          | from 4 frogs (= indep. exp.)                                                                                                          | mean +/- SEM | *                                   | (miR-181a-2-3p MO vs co-MO)                   | 0.0286 |
| miRNA expression level after MOs 3p microinjection                  | S6C |             |                                         |      |                                                  |                                                                                                                                       |              |                                     |                                               |        |
| miR181 co-MO                                                        |     | N too small | Mann-Whitney 2-tailed                   | 4    | 4 biological replicates                          | from 4 frogs (= indep. exp.)                                                                                                          | mean +/- SEM | *                                   | (miR-181a-5p MO vs co-MO)                     | 0.0286 |
| miR181 MO                                                           |     | N too small | Mann-Whitney 2-tailed                   | 4    | 4 biological replicates                          | from 4 frogs (= indep. exp.)                                                                                                          | mean +/- SEM | *                                   | (miR-181a-1-3p MO vs co-MO)                   | 0.0286 |
| miR181a-1-3p co-MO                                                  |     | N too small | Mann-Whitney 2-tailed                   | 4    | 4 biological replicates                          | from 4 frogs (= indep. exp.)                                                                                                          | mean +/- SEM | *                                   | (miR-181a-1-3p MO vs co-MO)                   | 0.0286 |
| miR181a-1-3p MO                                                     |     | N too small | Mann-Whitney 2-tailed                   | 4    | 4 biological replicates                          | from 4 frogs (= indep. exp.)                                                                                                          | mean +/- SEM | *                                   | (miR-181a-1-3p MO vs co-MO)                   | 0.0286 |
| miR181a-2-3p co-MO                                                  |     | N too small | Mann-Whitney 2-tailed                   | 4    | 4 biological replicates                          | from 4 frogs (= indep. exp.)                                                                                                          | mean +/- SEM | *                                   | (miR-181a-2-3p MO vs co-MO)                   | 0.0286 |
| miR181a-2-3p MO                                                     |     | N too small | Mann-Whitney 2-tailed                   | 4    | 4 biological replicates                          | from 4 frogs (= indep. exp.)                                                                                                          | mean +/- SEM | *                                   | (miR-181a-2-3p MO vs co-MO)                   | 0.0286 |
| qPCR axonal transfection MOs 5p                                     | S6E |             |                                         |      |                                                  |                                                                                                                                       |              |                                     |                                               |        |
| PBS co-MO 181a-1-3p                                                 |     | N too small | Mann-Whitney 2-tailed                   | 6    | 4 biological replicates + 2 technical replicates | from 4 frogs (= indep. exp.)                                                                                                          | mean +/- SEM | *                                   | (181a-1-3p PBS co-MO vs 181a-1-3p Sema co-MO) | 0.0411 |
| Sema3A co-MO 181a-1-3p                                              |     | N too small | Mann-Whitney 2-tailed                   | 6    | 4 biological replicates + 2 technical replicates | from 4 frogs (= indep. exp.)                                                                                                          | mean +/- SEM |                                     |                                               |        |
| PBS MO 181a-1-3p                                                    |     | N too small | Mann-Whitney 2-tailed                   | 6    | 4 biological replicates + 2 technical replicates | from 4 frogs (= indep. exp.)                                                                                                          | mean +/- SEM | ns                                  | (181a-1-3p PBS MO vs 181a-1-3p Sema MO)       | 0.6753 |
| Sema3A MO 181a-1-3p                                                 |     | N too small | Mann-Whitney 2-tailed                   | 6    | 4 biological replicates + 2 technical replicates | from 4 frogs (= indep. exp.)                                                                                                          | mean +/- SEM |                                     |                                               |        |
| qPCR axonal transfection MOs 3p                                     | S6F |             |                                         |      |                                                  |                                                                                                                                       |              |                                     |                                               |        |
| PBS co-MO 181a-1-3p                                                 |     | N too small | Mann-Whitney 2-tailed                   | 4    | 3 biological replicates + 1 technical replicate  | from 3 frogs (= indep. exp.)                                                                                                          | mean +/- SEM | *                                   | (181a-5p PBS coMO vs 181a-5p Sema coMO)       | 0.0286 |
| Sema3A co-MO 181a-1-3p                                              |     | N too small | Mann-Whitney 2-tailed                   | 4    | 3 biological replicates + 1 technical replicate  | from 3 frogs (= indep. exp.)                                                                                                          | mean +/- SEM |                                     |                                               |        |
| PBS MO 181a-1-3p                                                    |     | N too small | Mann-Whitney 2-tailed                   | 4    | 3 biological replicates + 1 technical replicate  | from 3 frogs (= indep. exp.)                                                                                                          | mean +/- SEM | ns                                  | (181a-5p PBS MO vs 181a-5p Sema MO)           | 0.9714 |
| Sema3A MO 181a-1-3p                                                 |     | N too small | Mann-Whitney 2-tailed                   | 4    | 3 biological replicates + 1 technical replicate  | from 3 frogs (= indep. exp.)                                                                                                          | mean +/- SEM |                                     |                                               |        |
| Ratio of misprojecting axons co-MO vs miR-181 MO stage 40           | 7C  |             |                                         |      |                                                  |                                                                                                                                       |              |                                     |                                               |        |
| co-MO                                                               |     | no          | Mann-Whitney 2-tailed                   | 45   | numbers of brains, hence of embryos              | from 4 frogs (= indep. exp.)                                                                                                          | mean +/- SEM | **** (co-MO vs miR-181 MO family)   | < 0.0001                                      |        |
| miR-181 family                                                      |     | no          | Mann-Whitney 2-tailed                   | 52   | numbers of brains, hence of embryos              | from 4 frogs (= indep. exp.)                                                                                                          | mean +/- SEM |                                     |                                               |        |

|                                                                     |                                     |           |                                                                             |     |                                     |                              |              |                                                                 |          |  |  |  |
|---------------------------------------------------------------------|-------------------------------------|-----------|-----------------------------------------------------------------------------|-----|-------------------------------------|------------------------------|--------------|-----------------------------------------------------------------|----------|--|--|--|
| Ratio of misprojecting axons rescue experiment with mimics stage 40 |                                     | <b>7E</b> |                                                                             |     |                                     |                              |              |                                                                 |          |  |  |  |
|                                                                     | co-MO+ctrl mimics                   | yes       | 1-way ANOVA multiple comparison (Tukey)                                     | 96  | number of co-electroporated axons   | from 4 frogs (= indep. exp.) | mean +/- SEM | ** (co-MO + ctrl mimics vs. miR-181-MO + ctrl mimics)           | 0.0055   |  |  |  |
|                                                                     | miR-181 MO + ctrl mimics            | yes       | 1-way ANOVA multiple comparison (Tukey)                                     | 101 | number of co-electroporated axons   | from 4 frogs (= indep. exp.) | mean +/- SEM | ns (co-MO + ctrl mimics vs. miR-181-MO + miR-181ab mimics)      | 0.9431   |  |  |  |
|                                                                     | miR-181 MO + miR181ab mimics        | yes       | 1-way ANOVA multiple comparison (Tukey)                                     | 134 | number of co-electroporated axons   | from 4 frogs (= indep. exp.) | mean +/- SEM | ** (miR-181-MO + ctrl mimics vs. miR-181-MO + miR-181ab mimics) | 0.0089   |  |  |  |
| Ratio of misprojecting axons co-MO vs miR-181 MO stage 44/45        |                                     | <b>7G</b> |                                                                             |     |                                     |                              |              |                                                                 |          |  |  |  |
|                                                                     | co-MO                               | no        | Mann-Whitney 2-tailed                                                       | 21  | numbers of brains, hence of embryos | from 3 frogs (= indep. exp.) | mean +/- SEM | **** (co-MO vs miR-181 MO family)                               | < 0.0001 |  |  |  |
|                                                                     | miR-181                             | yes       | Mann-Whitney 2-tailed                                                       | 31  | numbers of brains, hence of embryos | from 3 frogs (= indep. exp.) | mean +/- SEM |                                                                 |          |  |  |  |
| In vivo behavioural assay stage 44/45                               |                                     | <b>7I</b> |                                                                             |     |                                     |                              |              |                                                                 |          |  |  |  |
|                                                                     |                                     | no        | Mann-Whitney 2-tailed                                                       | 43  | numbers of brains, hence of embryos | from 4 frogs (= indep. exp.) | mean +/- SEM | * (co-MO vs miR-181 MO)                                         | 0.0323   |  |  |  |
|                                                                     |                                     | no        | Mann-Whitney 2-tailed                                                       | 45  | numbers of brains, hence of embryos | from 4 frogs (= indep. exp.) | mean +/- SEM |                                                                 |          |  |  |  |
| In vivo behavioural assay stage 44/45 blind control                 |                                     | <b>7D</b> |                                                                             |     |                                     |                              |              |                                                                 |          |  |  |  |
|                                                                     |                                     | no        | Mann-Whitney 2-tailed                                                       | 15  | number of embryos                   | from 4 frogs (= indep. exp.) | mean +/- SEM | **** (WT vs blind)                                              | < 0.0001 |  |  |  |
|                                                                     |                                     | no        | Mann-Whitney 2-tailed                                                       | 14  | number of embryos                   | from 4 frogs (= indep. exp.) | mean +/- SEM |                                                                 |          |  |  |  |
| FRAP on TUBB3 ex vivo wt, mut, Sema3A                               |                                     | <b>8B</b> |                                                                             |     |                                     |                              |              |                                                                 |          |  |  |  |
|                                                                     | TUBB3 wt                            |           | Non linear regression - comparisons of fit (one phase decay) Y0, Plateau, K | 13  | number of single FRAP axon          | from 5 frogs (= indep. exp.) | mean +/- SEM |                                                                 |          |  |  |  |
|                                                                     | TUBB3 wt + Sema3A                   |           | Non linear regression - comparisons of fit (one phase decay) Y0, Plateau, K | 13  | number of single FRAP axon          | from 5 frogs (= indep. exp.) | mean +/- SEM |                                                                 |          |  |  |  |
|                                                                     | TUBB3 mut                           |           | Non linear regression - comparisons of fit (one phase decay) Y0, Plateau, K | 14  | number of single FRAP axon          | from 5 frogs (= indep. exp.) | mean +/- SEM | Table 4 reported FRAP experiment stat                           |          |  |  |  |
|                                                                     | TUBB3 mut + Sema3A                  |           | Non linear regression - comparisons of fit (one phase decay) Y0, Plateau, K | 13  | number of single FRAP axon          | from 5 frogs (= indep. exp.) | mean +/- SEM |                                                                 |          |  |  |  |
|                                                                     | TUBB3 mut + Sema3A + CHX            |           | Non linear regression - comparisons of fit (one phase decay) Y0, Plateau, K | 12  | number of single FRAP axon          | from 5 frogs (= indep. exp.) | mean +/- SEM |                                                                 |          |  |  |  |
|                                                                     | no UTR                              |           | Non linear regression - comparisons of fit (one phase decay) Y0, Plateau, K | 12  | number of single FRAP axon          | from 5 frogs (= indep. exp.) | mean +/- SEM |                                                                 |          |  |  |  |
| FRAP on TUBB3 ex vivo - isolated axons                              |                                     | <b>8C</b> |                                                                             |     |                                     |                              |              |                                                                 |          |  |  |  |
|                                                                     | TUBB3 mut - isolated axons          |           | Non linear regression - comparisons of fit (one phase decay) Y0, Plateau, K | 12  | number of single FRAP axon          | from 3 frogs (= indep. exp.) | mean +/- SEM | ns (mut vs mut+Sema3A)                                          | 0.5053   |  |  |  |
|                                                                     | TUBB3 mut + Sema3A - isolated axons |           | Non linear regression - comparisons of fit (one phase decay) Y0, Plateau, K | 13  | number of single FRAP axon          | from 3 frogs (= indep. exp.) | mean +/- SEM | Table 4 reported FRAP experiment stat                           |          |  |  |  |
| FRAP on TUBB3 ex vivo co-MO vs MO                                   |                                     | <b>8D</b> |                                                                             |     |                                     |                              |              |                                                                 |          |  |  |  |
|                                                                     | TUBB3 co-MO Sema3A                  |           | Non linear regression - comparisons of fit (one phase decay) Y0, Plateau, K | 14  | number of single FRAP axon          | from 3 frogs (= indep. exp.) | mean +/- SEM | **** (TUBB3 coMO vs MO)                                         | < 0.0001 |  |  |  |
|                                                                     | TUBB3 MO Sema3A                     |           | Non linear regression - comparisons of fit (one phase decay) Y0, Plateau, K | 16  | number of single FRAP axon          | from 3 frogs (= indep. exp.) | mean +/- SEM | Table 4 reported FRAP experiment stat                           |          |  |  |  |
| FRAP on TUBB3 in vivo                                               |                                     | <b>8E</b> |                                                                             |     |                                     |                              |              |                                                                 |          |  |  |  |
|                                                                     | TUBB3 wt                            |           | Non linear regression - comparisons of fit (one phase decay) Y0, Plateau, K | 12  | number of single FRAP axon          | from 3 frogs (= indep. exp.) | mean +/- SEM | ** (TUBB3 wt vs TUBB3 mut in vivo)                              | 0.005    |  |  |  |
|                                                                     | TUBB3 mut                           |           | Non linear regression - comparisons of fit (one phase decay) Y0, Plateau, K | 14  | number of single FRAP axon          | from 3 frogs (= indep. exp.) | mean +/- SEM | **** (TUBB3 mut vs no UTR)                                      | < 0.0001 |  |  |  |
|                                                                     | no UTR                              |           | Non linear regression - comparisons of fit (one phase decay) Y0, Plateau, K | 8   | number of single FRAP axon          | from 3 frogs (= indep. exp.) | mean +/- SEM | **** (TUBB3 wt vs no UTR)                                       | < 0.0001 |  |  |  |
|                                                                     |                                     |           |                                                                             |     |                                     |                              |              | Table 4 reported FRAP experiment stat                           |          |  |  |  |
| FRAP on APP ex vivo wt, mut, Sema3A                                 |                                     | <b>8F</b> |                                                                             |     |                                     |                              |              |                                                                 |          |  |  |  |
|                                                                     | APP wt                              |           | Non linear regression - comparisons of fit (one phase decay) Y0, Plateau, K | 13  | number of single FRAP axon          | from 4 frogs (= indep. exp.) | mean +/- SEM |                                                                 |          |  |  |  |
|                                                                     | APP wt + Sema3A                     |           | Non linear regression - comparisons of fit (one phase decay) Y0, Plateau, K | 13  | number of single FRAP axon          | from 4 frogs (= indep. exp.) | mean +/- SEM | Table 4 reported FRAP experiment stat                           |          |  |  |  |
|                                                                     | APP mut                             |           | Non linear regression - comparisons of fit (one phase decay) Y0, Plateau, K | 13  | number of single FRAP axon          | from 4 frogs (= indep. exp.) | mean +/- SEM |                                                                 |          |  |  |  |
|                                                                     | APP mut + Sema3A                    |           | Non linear regression - comparisons of fit (one phase decay) Y0, Plateau, K | 13  | number of single FRAP axon          | from 4 frogs (= indep. exp.) | mean +/- SEM |                                                                 |          |  |  |  |
| FRAP on THBS1 ex vivo wt, mut, Sema3A                               |                                     | <b>8G</b> |                                                                             |     |                                     |                              |              |                                                                 |          |  |  |  |
|                                                                     | THBS1 wt                            |           | Non linear regression - comparisons of fit (one phase decay) Y0, Plateau, K | 11  | number of single FRAP axon          | from 3 frogs (= indep. exp.) | mean +/- SEM |                                                                 |          |  |  |  |
|                                                                     | THBS1 wt + Sema3A                   |           | Non linear regression - comparisons of fit (one phase decay) Y0, Plateau, K | 11  | number of single FRAP axon          | from 3 frogs (= indep. exp.) | mean +/- SEM | Table 4 reported FRAP experiment stat                           |          |  |  |  |
|                                                                     | THBS1 mut                           |           | Non linear regression - comparisons of fit (one phase decay) Y0, Plateau, K | 11  | number of single FRAP axon          | from 3 frogs (= indep. exp.) | mean +/- SEM |                                                                 |          |  |  |  |
|                                                                     | THBS1 mut + Sema3A                  |           | Non linear regression - comparisons of fit (one phase decay) Y0, Plateau, K | 11  | number of single FRAP axon          | from 3 frogs (= indep. exp.) | mean +/- SEM |                                                                 |          |  |  |  |
| FRAP on ACTB ex vivo                                                |                                     | <b>8C</b> |                                                                             |     |                                     |                              |              |                                                                 |          |  |  |  |
|                                                                     | ACTB                                |           | Non linear regression - comparisons of fit (one phase decay) Y0, Plateau, K | 9   | number of single FRAP axon          | from 3 frogs (= indep. exp.) | mean +/- SEM | **** (ACTB vs ACTB + CHX )                                      | < 0.0001 |  |  |  |
|                                                                     | ACTB + CHX                          |           | Non linear regression - comparisons of fit (one phase decay) Y0, Plateau, K | 9   | number of single FRAP axon          | from 3 frogs (= indep. exp.) | mean +/- SEM | Table 4 reported FRAP experiment stat                           |          |  |  |  |
